# Supplementary material
Source: publisher figshare collection journal article supplement (https://tandf.figshare.com/articles/dataset/_/7038833)

# Quaternary terraces of the Motueka River

Projected surface intersection of the main bounding faults of the Moutere basement pop-up

Divide

IMD

Intra-Moutere Divide

Motueka R.

Moutere R.

Waiitea R.

Wangapeka R.

Matariki F.

Motupiko R.

Wai-iti R.

Waimea-Flaxmore Fault System

Porika Terrace  
(2.2-2.1 Ma)

Manuka Terrace and fan  
(Q6 186-129 ka?)

Tophouse Terrace  
(Q4, 28 ka)

Speargrass Terrace  
(Q2, 13 ka)

South flowing river captured by Motueka R. ?

Alpine Fault

Survile F.

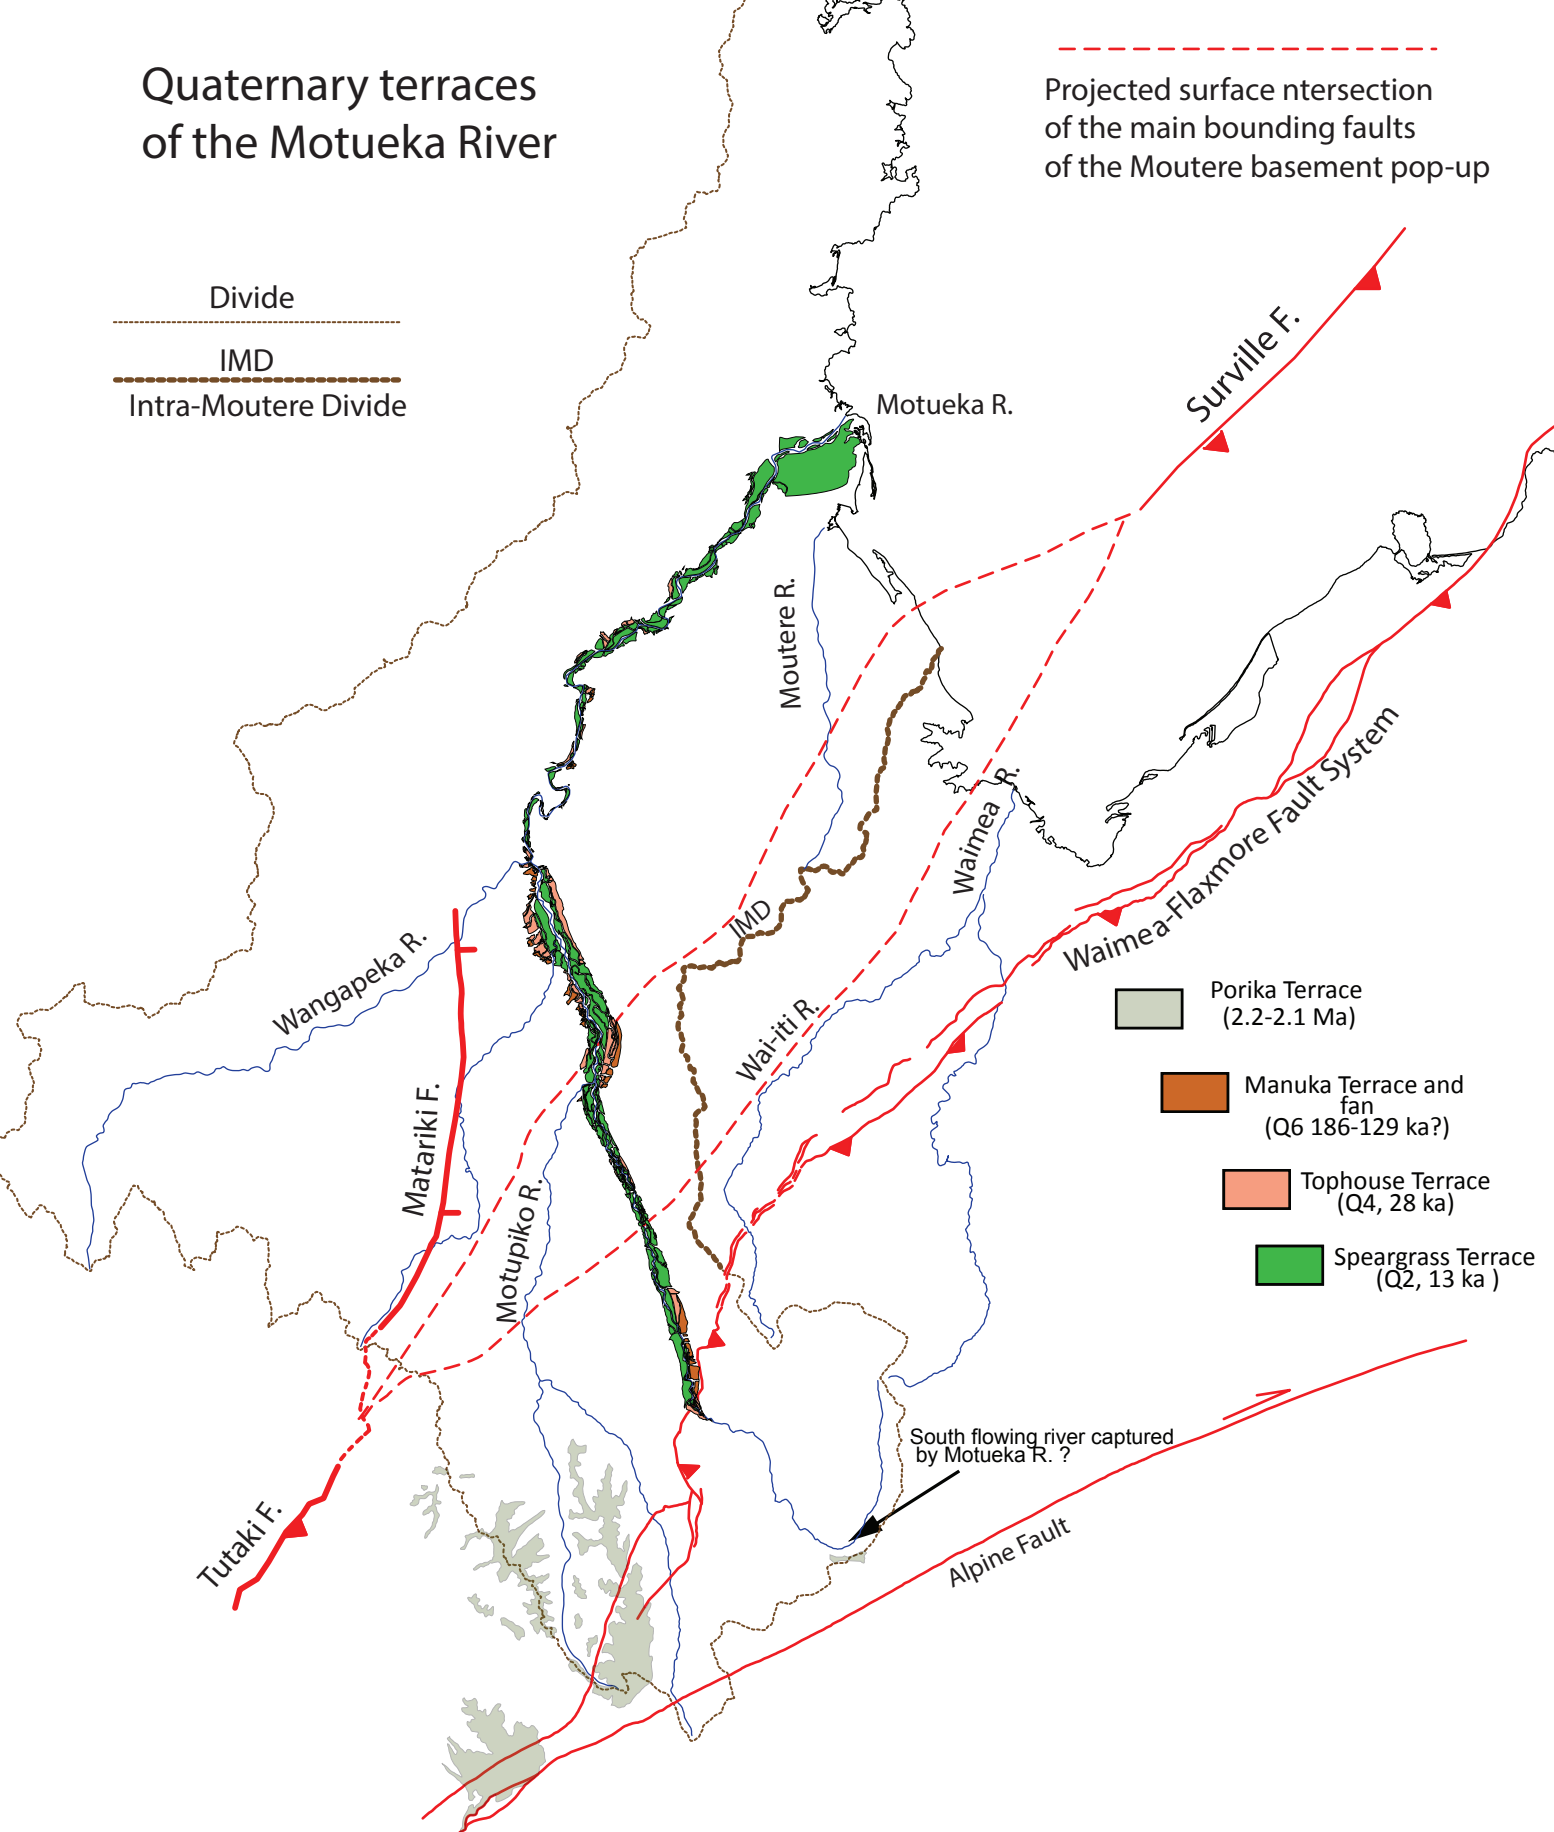

Supplement: Supplementary file 1 [file 1]
